# Supplementary material for: Allergic Rhinitis in Preschool Children and the Clinical Utility of FeNO
Source: PubMed Central journal article supplement — Allergy Asthma Immunol Res. 2017 Mar 2;9(4):314–21. doi: 10.4168/aair.2017.9.4.314 (PMC5446946; doi:10.4168/aair.2017.9.4.314), 2017-03-02
Supplement: aair-9-314-s001.pdf [file aair-9-314-s001.pdf]

## SUPPLEMENTAL MATERIALS

### Supplemental Methods

A significant linear correlation between fractional exhaled nitric oxide (FeNO), total serum immunoglobulin E (IgE) levels, and blood eosinophil percentage was observed ( $r=0.244$ ,  $P<0.001$  for serum IgE and  $r=0.296$ ,  $P<0.001$  for blood eosinophilia; Supplementary Figs. 3A and B).

IgE was expressed as  $\mu\text{g/L}$ , eosinophilia was expressed as cells/ $\mu\text{L}$  and reported on the abscissa, whereas FeNO levels were expressed as ppb and reported on the ordinate (Supplementary Fig. 3A). Blood eosinophilia was expressed as a percentage (%) and reported on the abscissa, whereas FeNO levels were expressed as ppb and reported on the ordinate (Supplementary Fig. 3B). Statistical analysis was performed using Spearman's correlation.
