# Supplementary material for: Allergic Rhinitis in Preschool Children and the Clinical Utility of FeNO
Source: PubMed Central journal article supplement — Allergy Asthma Immunol Res. 2017 Mar 2;9(4):314–21. doi: 10.4168/aair.2017.9.4.314 (PMC5446946; doi:10.4168/aair.2017.9.4.314), 2017-03-02
Supplement: aair-9-314-s003.pdf [file aair-9-314-s003.pdf]

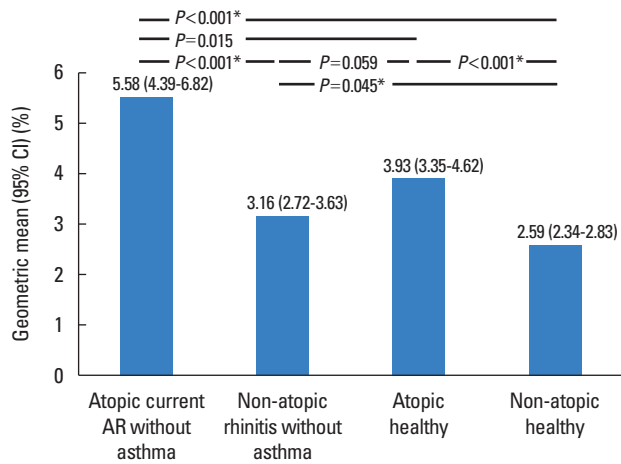

**Supplementary Fig. 2.** Comparisons of blood eosinophil percentage between children having current atopic AR without asthma and atopic and non-atopic healthy children. AR, allergic rhinitis; CI, confidence interval. \* $P < 0.01$ .
