# Supplementary material for: Allergic Rhinitis in Preschool Children and the Clinical Utility of FeNO
Source: PubMed Central journal article supplement — Allergy Asthma Immunol Res. 2017 Mar 2;9(4):314–21. doi: 10.4168/aair.2017.9.4.314 (PMC5446946; doi:10.4168/aair.2017.9.4.314), 2017-03-02
Supplement: aair-9-314-s004.pdf [file aair-9-314-s004.pdf]

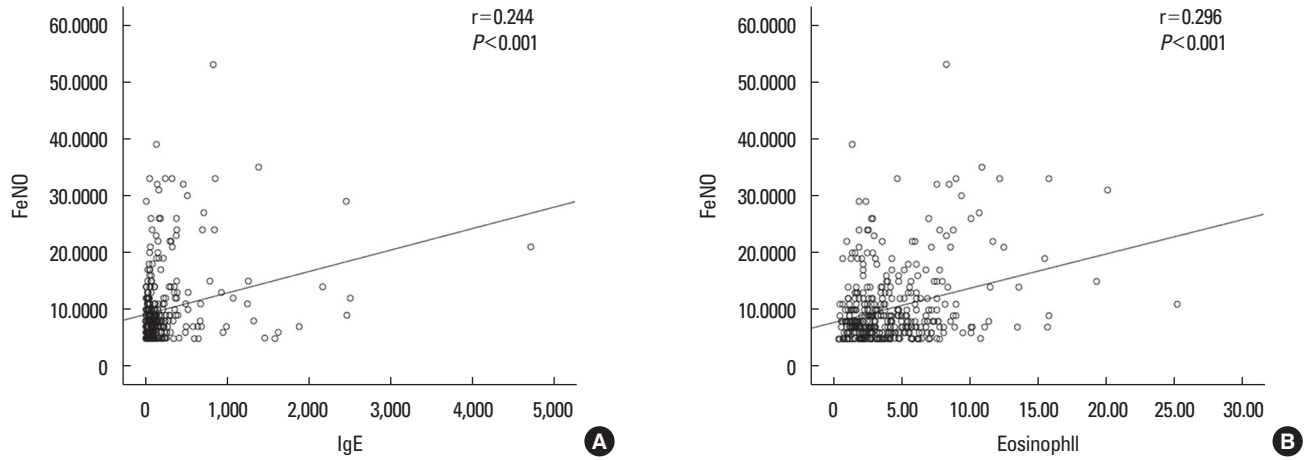

**Supplementary Fig. 3.** (A) Correlation between FeNO and IgE levels. (B) Correlation between FeNO levels and blood eosinophilia. FeNO, fractional exhaled nitric oxide; IgE, immunoglobulin E.
